# Supplementary material for: Knowledge, Attitude and Practices of Self-Medication Including Antibiotics among Health Care Professionals during the COVID-19 Pandemic in Pakistan: Findings and Implications
Source: MDPI journal article supplement (doi:10.3390/antibiotics12030481), 2023-02-28
Supplement: s1 [file s1]

**Supplementary Table S1 – Study Questionnaire - Knowledge, attitude and practices of Self-medication among health care professional during COVID-19 pandemic in Punjab Pakistan**

**Section 1      Demographic details of study participants**

**Name of Institution .....**

**Name of Distirct.....**

**Q1      Gender**

- 1      Male
- 2      Female

**Q2      Age (Years)**

- 1      20-30
- 2      31-40
- 3      41-50
- 4      51-60

**Q3      Residence**

- 1      Urban
- 2      Rural

**Q4      Marital status**

- 1      Single/divorced/widow
- 2      Married

**Q5      Occupation**

- 1      Doctors
- 2      Pharmacist
- 3      Nurse
- 4      Laboratory personnel
- 5      Physiotherapist
- 6      Health assistants/technicians
- 7      Others

**Q6      Education level?**

- 6      Diploma
- 7      Bachelor's degree
- 8      Post graduation/specialization

**Q7      Working department**

- 1      COVID-19 ward
- 2      Emergency
- 3      Medicine
- 4      Surgery
- 5      Pediatrics
- 6      Gynae
- 7      Cardiac
- 8      Others

**Q8      Hospital Type**

- 1      Tertiary care
- 2      Secondary care
- 3      Primary care

**Q9      Working experience**

- 1      1-3 years
- 2      4-7 years
- 3      8-12 years
- 4      More than 12 years

**Section 2      Knowledge of self-medications among health care professionals****(Please select one option from Yes, No and Don't Know)**

| Questions                                                                                           | Yes | No | Don't know |
|-----------------------------------------------------------------------------------------------------|-----|----|------------|
| Self-medication is defined as self-consuming of medications without getting advice from a physician |     |    |            |
| Self-medication is safe?                                                                            |     |    |            |
| All medications (PRESCRIPTION OTC, HERBAL) have adverse effects?                                    |     |    |            |
| Increasing or decreasing medications dose without a doctor consultation can be dangerous?           |     |    |            |
| In case of adverse effects, physician help must be sought                                           |     |    |            |
| Using medications with unknown substances in patient with liver and kidney disease is dangerous     |     |    |            |
| Self-medication can mask signs and symptoms of some disease?                                        |     |    |            |

**Section 3      Attitude of health care professionals about self-medications****(Please select one option from strongly agree, Agree, Uncertain, Disagree, Strongly Disagree)**

| Questions                                                                                                                    | Strongly agree | Agree | Uncertain | Disagree | Strongly disagree |
|------------------------------------------------------------------------------------------------------------------------------|----------------|-------|-----------|----------|-------------------|
| Self-medication is part of self-care                                                                                         |                |       |           |          |                   |
| No need for training to use self-medication                                                                                  |                |       |           |          |                   |
| Health care professionals are able to diagnosing different diseases                                                          |                |       |           |          |                   |
| Health care professionals are able to treat different diseases                                                               |                |       |           |          |                   |
| Do you recommend self-medications to others                                                                                  |                |       |           |          |                   |
| Easy access to healthcare information and facilities are the main causes that health care professionals use self-medications |                |       |           |          |                   |
| The availability of OTC medicines and belief on its safety leading me to use self-medications                                |                |       |           |          |                   |

**Section 4      Practices of self-medications among health care professionals****(Please select one option from below)****Self-medication during COVID-19?**

- 1      Yes
- 2      No

**Reason for self-medication?**

- 1      No symptoms
- 2      Cold or flu
- 3      COVID-19 preventives
- 4      COVID-19 symptoms
- 5      COVID-19 positive
- 6      Consume it regularly
- 7      Other reason

**Symptom improvement**

- 1 All symptoms improved
- 2 Many symptoms improved
- 3 Some symptoms improved
- 4 One symptom improved
- 5 No improvement

**Section 5 Commonly use drugs under self-medication**

Please select medicine(s) used under self-medication in last six months

| Class                            | Agents                                                                                                                                                                   | Yes | No |
|----------------------------------|--------------------------------------------------------------------------------------------------------------------------------------------------------------------------|-----|----|
| Antibiotics                      | 1 Amoxicillin<br>2 Amoxicillin+clavulonic acid<br>3 Azithromycin<br>4 Ciprofloxacin<br>5 Levofloxacin<br>6 Moxifloxacin<br>7 Cefixime<br>8 Erythromycin<br>9 Doxycycline |     |    |
| Antiallergic                     | 1 Ibastine<br>2 Fexofenadine<br>3 Citrizine                                                                                                                              |     |    |
| Leukotrienes receptor antagonist | Montelukast                                                                                                                                                              |     |    |
| Ivermectin                       | Ivermectin                                                                                                                                                               |     |    |
| Multivitamins                    | Multivitamins                                                                                                                                                            |     |    |
| Zinc supplement                  | Zinc supplement                                                                                                                                                          |     |    |
| Vitamin C + Calcium              | Vitamin C + Calcium                                                                                                                                                      |     |    |
| Antipyretics                     | Paracetamol                                                                                                                                                              |     |    |
| Cough preparations               | Cough preparations                                                                                                                                                       |     |    |
| Herbal medicines                 | Herbal medicines                                                                                                                                                         |     |    |
| Any others                       | Others                                                                                                                                                                   |     |    |
